# Supplementary material
Source: ML conference proceedings conference paper supplement (https://openreview.net/forum?id=ZNaNFjIkrP)
Supplement: supplementary_material [file attachment]

---

# Approximating Probabilistic Explanations via Supermodular Minimization (Supplementary Material)

---

Louenas Bounia<sup>1</sup>

Frederic Koriche<sup>1</sup>

<sup>1</sup>CRIL UMR CNRS 8188, Université d’Artois, France

## A ADDITIONAL EXPERIMENTS

In this section, we present all experimental results obtained for all benchmarks. Recall that for each benchmark  $b$ , an explanation task consists a tuple  $(\mathcal{T}, \mathbf{x}, I, k)$ , where

- $\mathcal{T}$  is a decision tree learned, using the CART algorithm;
- $\mathbf{x}$  is a data instance from the test set, which is binarized according to the features in  $\mathcal{T}$ ;
- $I$  is a path-explanation for  $\mathbf{x}$  and  $\mathcal{T}$ ;
- $k$  is the size limit.

Let  $h$  denote the hypothesis associated with  $\mathcal{T}$ . As indicated in the main paper, the performance of explainers on a benchmark  $b$  is measured by drawing uniformly at random  $m$  instances  $\mathbf{x}$  from the test set of  $b$ , and averaging the resulting error  $\epsilon_{h,\mathbf{x}}(S)$  and size  $|S|$  of the output  $S \subseteq I$ . In our experiments,  $m = \min\{s, 150\}$ , where  $s$  is the size of the test set of  $b$ . The URL addresses of all benchmarks is given in Table 4.

**Results for  $k = 7$ .** In Table 2 are reported the results for all the 50 benchmarks considered in this study. The leftmost column gives the name of the dataset  $b$ , and the next two columns report statistics about the decision tree accuracy ( $acc$ ), and the number of its internal nodes ( $d$ ). The fourth column gives the average size of the path-explanation  $I$  for a random ( $d$ -dimensional) test instance  $\mathbf{x}$ . The next two groups of three columns report the average errors ( $\epsilon_{h,\mathbf{x}}(S)$ ) and sizes ( $|S|$ ) for the approximation algorithms GA and GD, and the SAT-based method. Finally, the average runtime of the SAT-method is provided in the last column. The benchmarks colored in blue indicate that, for some explanation tasks, the SAT-method has reached the timeout before completing binary search, which results in a degradation of precision (and conciseness). For the benchmarks in magenta, the solver could not perform a single run of binary search before reaching the timeout.

**Results for  $k = 7 \pm 2$ .** In Figure 4 are merged 12 bar plots reporting the error results for GA and GD, when  $k$  ranges from 5 to 9. Note that for most of these explanation tasks, the SAT solver could not complete binary search before reaching the timeout. We can observe that the performances of GA and GD are very similar. A notable exception is the dataset *compas*, where GA is slightly better than GD when  $k$  increases.

**Results for  $I = [d]$  (and  $k = 7$ ).** As emphasized by Izza et al. 2022, path-explanations are not necessarily abductive, since decision trees can include irrelevant features. Nevertheless, the above results indicate that GA and GD are robust enough to reduce such input explanations. Through further analysis, one may wonder whether these approximation algorithms are able to find probabilistic explanations when  $I$  is no longer a path-explanation for  $\mathbf{x}$  and  $\mathcal{T}$ , but includes all features occurring in  $\mathbf{x}$  (i.e.  $I = [d]$ ). The corresponding results are reported in Table 3. Unsurprisingly, the performance of the SAT-based approach degrades when  $d$  increases. We can also observe that the performance of GD is slightly worse than the performance of GA. Starting from  $S_n = [d]$ , GD must perform  $d$  iterations of the main loop, which increases the chance of reaching a bad local optimum. On the other hand, GA only performs  $\mathcal{O}(k \ln(1/\gamma))$  iterations of the main loop in order to select a solution that is close to the optimum found by the SAT approach.

## References

Yacine Izza, Alexey Ignatiev, and João Marques-Silva. On tackling explanation redundancy in decision trees. *Journal of Artificial Intelligence Research*, 75:261–321, 2022.

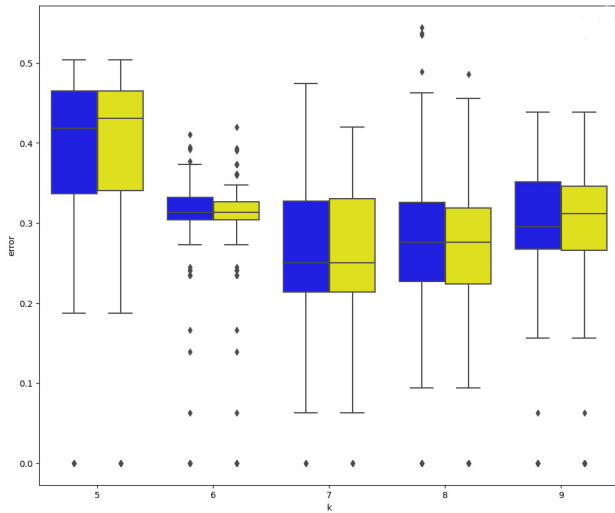

(a) *adult*

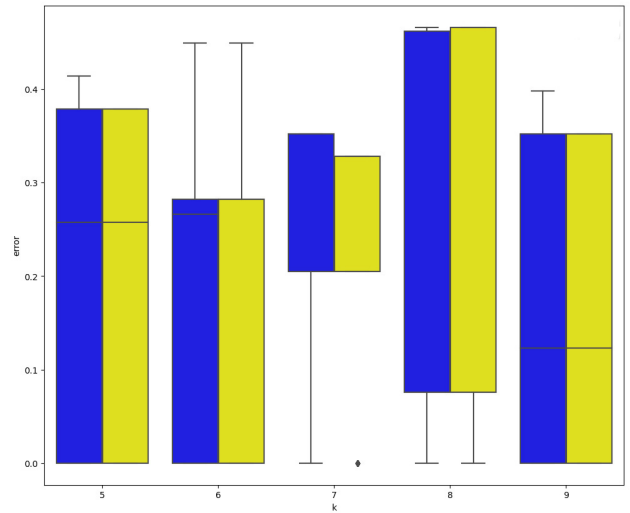

(b) *cnae*

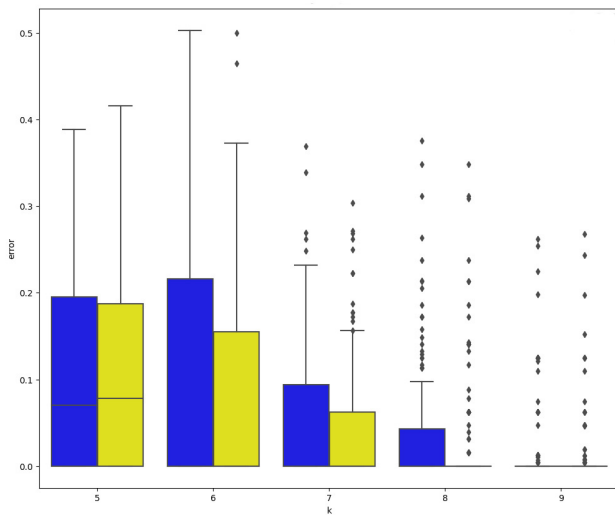

(c) *compas*

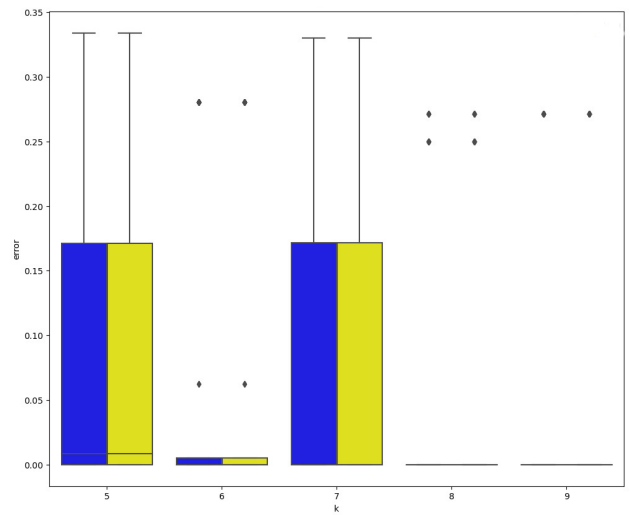

(d) *dexter*

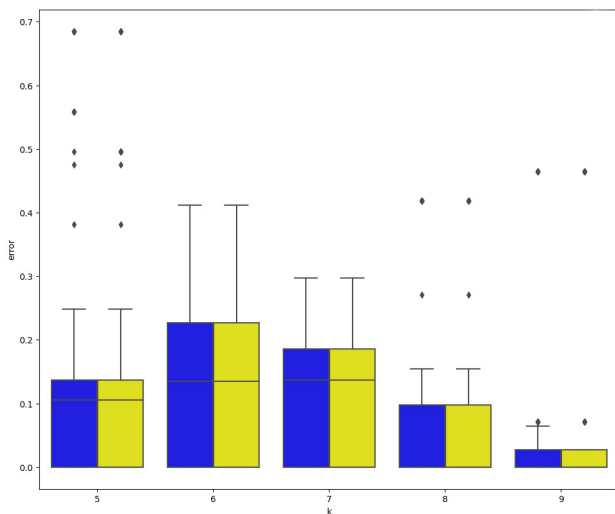

(e) *email spam*

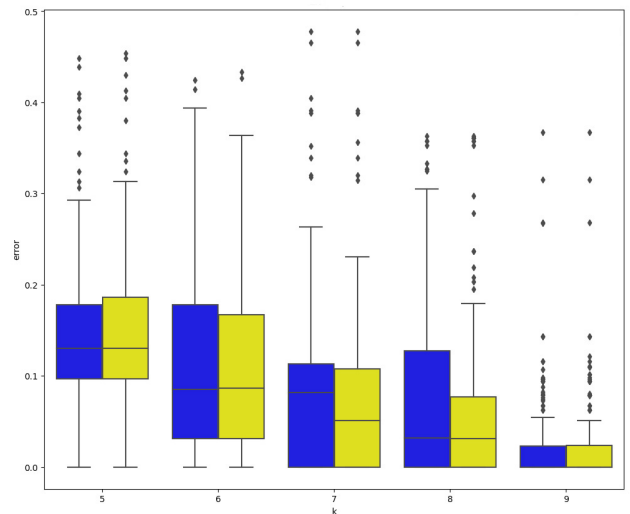

(f) *employee attr.*

Figure 4: Bar plots for the errors of GA (yellow) and GD (blue), using  $k = 7 \pm 2$ .

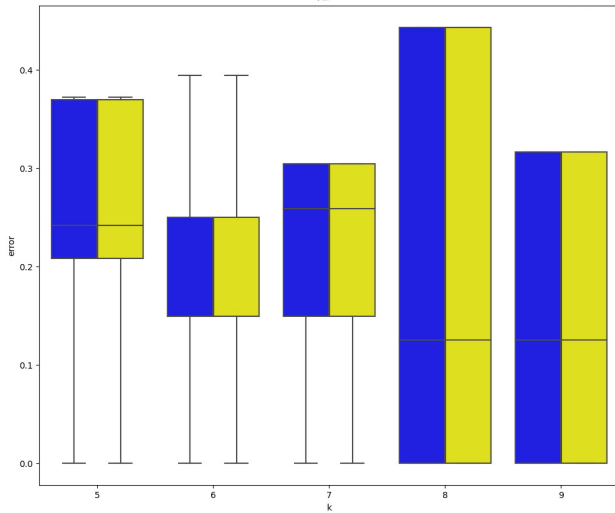

(g) farm ads

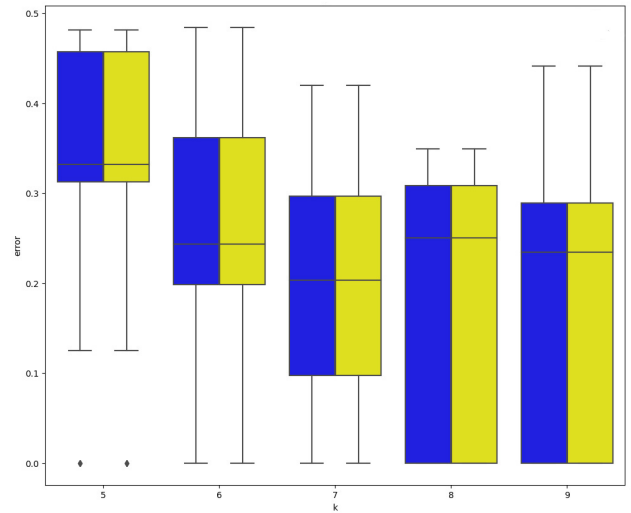

(h) gina agnostic

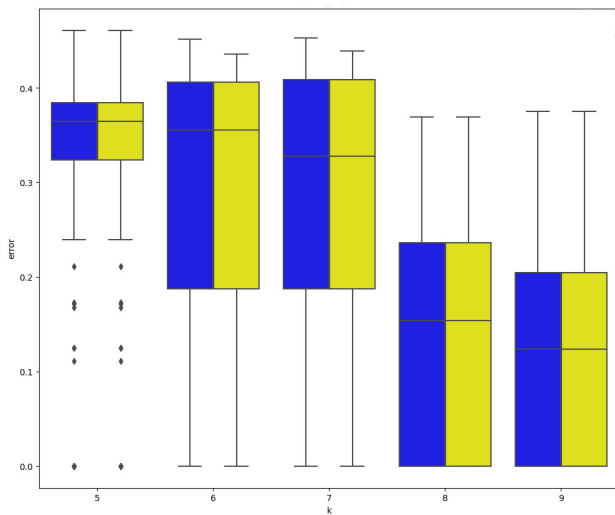

(i) gina prior

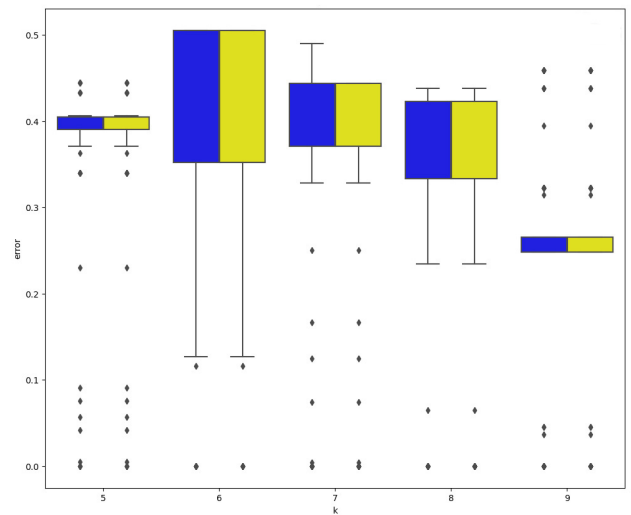

(j) gisette

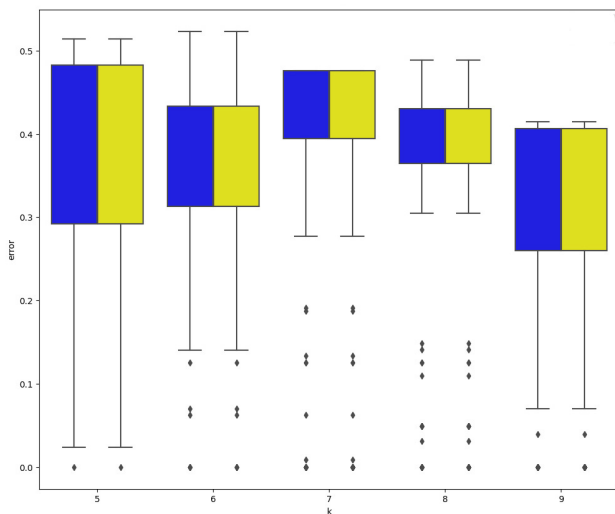

(k) mnist38

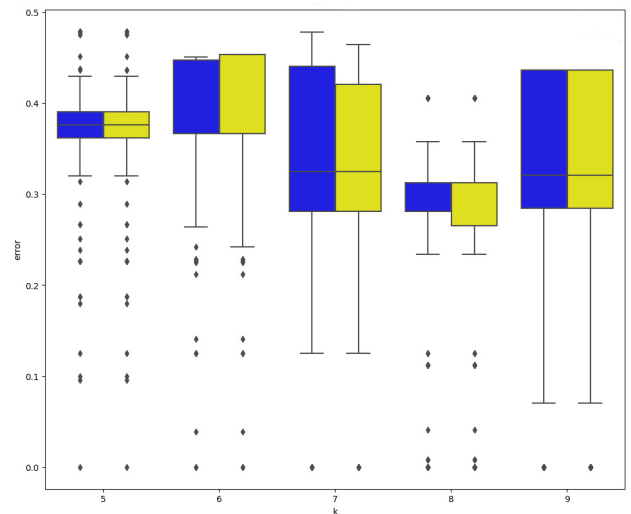

(l) mnist49

Figure 4: Bar plots for the errors of GA (yellow) and GD (blue), using  $k = 7 \pm 2$  (cont.).

| Benchmark               |       |        |       | $\epsilon_{h,\mathbf{x}}(S)$ |                     |                     | S    |      |      | Time (s) |
|-------------------------|-------|--------|-------|------------------------------|---------------------|---------------------|------|------|------|----------|
| name                    | acc   | d      | I     | GA                           | GD                  | SAT                 | GA   | GD   | SAT  | SAT      |
| <i>voting</i>           | 94.66 | 16     | 3.05  | 0.07 ( $\pm 0.09$ )          | 0.07 ( $\pm 0.09$ ) | 0.07 ( $\pm 0.09$ ) | 2.00 | 2.00 | 2.00 | 0.37     |
| <i>placement</i>        | 95.38 | 18     | 3.62  | 0.14 ( $\pm 0.20$ )          | 0.14 ( $\pm 0.20$ ) | 0.14 ( $\pm 0.20$ ) | 2.02 | 2.02 | 2.02 | 0.55     |
| <i>anneal2</i>          | 98.52 | 14     | 4.03  | 0.19 ( $\pm 0.11$ )          | 0.19 ( $\pm 0.11$ ) | 0.19 ( $\pm 0.11$ ) | 2.10 | 2.10 | 2.10 | 0.21     |
| <i>cars</i>             | 98.36 | 21     | 4.33  | 0.16 ( $\pm 0.11$ )          | 0.16 ( $\pm 0.11$ ) | 0.16 ( $\pm 0.11$ ) | 2.08 | 2.08 | 2.08 | 0.74     |
| <i>hepatitis</i>        | 83.72 | 13     | 4.47  | 0.05 ( $\pm 0.10$ )          | 0.05 ( $\pm 0.10$ ) | 0.05 ( $\pm 0.10$ ) | 3.00 | 3.00 | 3.00 | 0.41     |
| <i>autos</i>            | 87.10 | 21     | 4.50  | 0.12 ( $\pm 0.12$ )          | 0.12 ( $\pm 0.12$ ) | 0.12 ( $\pm 0.12$ ) | 3.53 | 3.53 | 3.53 | 0.72     |
| <i>backache</i>         | 88.89 | 18     | 4.83  | 0.24 ( $\pm 0.11$ )          | 0.24 ( $\pm 0.11$ ) | 0.24 ( $\pm 0.11$ ) | 2.22 | 2.22 | 2.22 | 0.66     |
| <i>cleveland2</i>       | 75.82 | 35     | 4.98  | 0.05 ( $\pm 0.08$ )          | 0.05 ( $\pm 0.08$ ) | 0.05 ( $\pm 0.08$ ) | 4.10 | 4.10 | 4.10 | 4.42     |
| <i>mushroom</i>         | 100   | 17     | 4.99  | 0.28 ( $\pm 0.15$ )          | 0.28 ( $\pm 0.15$ ) | 0.28 ( $\pm 0.15$ ) | 3.02 | 3.02 | 3.02 | 0.55     |
| <i>meta-data</i>        | 87.42 | 44     | 5.09  | 0.08 ( $\pm 0.11$ )          | 0.08 ( $\pm 0.11$ ) | 0.08 ( $\pm 0.11$ ) | 3.10 | 3.10 | 3.10 | 12.14    |
| <i>vehicle</i>          | 96.85 | 23     | 5.19  | 0.21 ( $\pm 0.10$ )          | 0.21 ( $\pm 0.10$ ) | 0.21 ( $\pm 0.10$ ) | 2.02 | 2.02 | 2.02 | 1.23     |
| <i>ionosphere</i>       | 95.28 | 19     | 5.22  | 0.54 ( $\pm 0.40$ )          | 0.54 ( $\pm 0.40$ ) | 0.54 ( $\pm 0.40$ ) | 1.03 | 1.03 | 1.03 | 0.39     |
| <i>kr-vs-kp</i>         | 99.79 | 32     | 5.29  | 0.21 ( $\pm 0.15$ )          | 0.21 ( $\pm 0.15$ ) | 0.21 ( $\pm 0.15$ ) | 1.07 | 1.07 | 1.07 | 2.08     |
| <i>balance</i>          | 85.64 | 17     | 5.37  | 0.06 ( $\pm 0.08$ )          | 0.06 ( $\pm 0.08$ ) | 0.06 ( $\pm 0.08$ ) | 4.03 | 4.03 | 4.03 | 1.82     |
| <i>glass</i>            | 78.46 | 31     | 5.38  | 0.26 ( $\pm 0.11$ )          | 0.26 ( $\pm 0.11$ ) | 0.26 ( $\pm 0.11$ ) | 2.14 | 2.14 | 2.14 | 2.36     |
| <i>student perf.</i>    | 91.79 | 30     | 5.41  | 0.26 ( $\pm 0.11$ )          | 0.26 ( $\pm 0.11$ ) | 0.26 ( $\pm 0.11$ ) | 2.00 | 2.00 | 2.00 | 2.16     |
| <i>biomed</i>           | 96.83 | 15     | 5.68  | 0.25 ( $\pm 0.10$ )          | 0.25 ( $\pm 0.10$ ) | 0.25 ( $\pm 0.10$ ) | 2.32 | 2.32 | 2.32 | 0.45     |
| <i>tae</i>              | 65.22 | 32     | 5.78  | 0.12 ( $\pm 0.19$ )          | 0.13 ( $\pm 0.20$ ) | 0.12 ( $\pm 0.18$ ) | 3.96 | 3.91 | 3.94 | 3.22     |
| <i>primary tumor</i>    | 84.31 | 23     | 6.23  | 0.09 ( $\pm 0.09$ )          | 0.09 ( $\pm 0.09$ ) | 0.09 ( $\pm 0.08$ ) | 4.22 | 4.22 | 4.22 | 3.58     |
| <i>liver disorders</i>  | 75.96 | 58     | 6.38  | 0.18 ( $\pm 0.09$ )          | 0.18 ( $\pm 0.08$ ) | 0.18 ( $\pm 0.08$ ) | 4.00 | 4.00 | 4.00 | 27.33    |
| <i>schizophrenia</i>    | 80.39 | 33     | 6.39  | 0.37 ( $\pm 0.24$ )          | 0.37 ( $\pm 0.24$ ) | 0.37 ( $\pm 0.24$ ) | 1.27 | 1.27 | 1.27 | 4.79     |
| <i>tic-tac-toe</i>      | 92.36 | 9      | 6.46  | 0.24 ( $\pm 0.13$ )          | 0.24 ( $\pm 0.13$ ) | 0.23 ( $\pm 0.10$ ) | 2.96 | 2.87 | 2.87 | 1.43     |
| <i>australian</i>       | 84.06 | 70     | 6.48  | 0.24 ( $\pm 0.13$ )          | 0.24 ( $\pm 0.14$ ) | 0.24 ( $\pm 0.13$ ) | 3.56 | 3.55 | 3.55 | 63.49    |
| <i>hungarian</i>        | 62.92 | 13     | 6.65  | 0.12 ( $\pm 0.12$ )          | 0.12 ( $\pm 0.12$ ) | 0.11 ( $\pm 0.10$ ) | 3.58 | 3.56 | 3.56 | 1.68     |
| <i>horse colic</i>      | 75.68 | 40     | 6.73  | 0.14 ( $\pm 0.07$ )          | 0.13 ( $\pm 0.07$ ) | 0.13 ( $\pm 0.07$ ) | 4.03 | 4.06 | 4.06 | 11.56    |
| <i>madelon</i>          | 66.41 | 500    | 7.33  | 0.06 ( $\pm 0.09$ )          | 0.06 ( $\pm 0.09$ ) | –                   | 6.50 | 6.50 | –    | –        |
| <i>haberman</i>         | 67.39 | 53     | 8.18  | 0.73 ( $\pm 0.11$ )          | 0.76 ( $\pm 0.09$ ) | 0.75 ( $\pm 0.10$ ) | 2.96 | 3.02 | 3.08 | 29.43    |
| <i>indian liver</i>     | 64.57 | 84     | 8.21  | 0.10 ( $\pm 0.09$ )          | 0.10 ( $\pm 0.09$ ) | 0.16 ( $\pm 0.12$ ) | 5.08 | 4.89 | 6.12 | 176.28   |
| <i>pima indians</i>     | 75.32 | 97     | 8.30  | 0.15 ( $\pm 0.14$ )          | 0.15 ( $\pm 0.14$ ) | 0.16 ( $\pm 0.12$ ) | 5.85 | 5.84 | 6.58 | 484.6    |
| <i>dexter</i>           | 86.11 | 20000  | 8.32  | 0.06 ( $\pm 0.08$ )          | 0.06 ( $\pm 0.08$ ) | –                   | 5.95 | 5.96 | –    | –        |
| <i>loan eligibility</i> | 74.31 | 68     | 8.47  | 0.19 ( $\pm 0.13$ )          | 0.18 ( $\pm 0.13$ ) | 0.20 ( $\pm 0.14$ ) | 5.60 | 5.70 | 6.82 | 42.87    |
| <i>patient treat.</i>   | 66.01 | 10     | 8.92  | 0.05 ( $\pm 0.09$ )          | 0.03 ( $\pm 0.06$ ) | 0.03 ( $\pm 0.08$ ) | 5.63 | 5.94 | 5.94 | 24.08    |
| <i>wine</i>             | 69.58 | 11     | 9.03  | 0.09 ( $\pm 0.10$ )          | 0.09 ( $\pm 0.09$ ) | 0.09 ( $\pm 0.12$ ) | 5.59 | 5.64 | 5.62 | 36.32    |
| <i>christine</i>        | 50.8  | 1023   | 9.47  | 0.28 ( $\pm 0.10$ )          | 0.28 ( $\pm 0.10$ ) | –                   | 7.00 | 6.99 | –    | –        |
| <i>gina agnostic</i>    | 85.31 | 970    | 9.69  | 0.20 ( $\pm 0.15$ )          | 0.20 ( $\pm 0.15$ ) | –                   | 6.90 | 6.90 | –    | –        |
| <i>email spam</i>       | 93.88 | 3000   | 10.46 | 0.09 ( $\pm 0.13$ )          | 0.09 ( $\pm 0.13$ ) | –                   | 5.22 | 5.22 | –    | –        |
| <i>gina prior</i>       | 85.59 | 784    | 10.53 | 0.27 ( $\pm 0.16$ )          | 0.27 ( $\pm 0.16$ ) | –                   | 6.89 | 6.89 | –    | –        |
| <i>employee attr.</i>   | 82.45 | 63     | 10.56 | 0.06 ( $\pm 0.09$ )          | 0.06 ( $\pm 0.09$ ) | 0.20 ( $\pm 0.11$ ) | 6.41 | 6.39 | 6.98 | 1017.24  |
| <i>contraceptive</i>    | 51.36 | 90     | 10.84 | 0.06 ( $\pm 0.08$ )          | 0.06 ( $\pm 0.08$ ) | 0.39 ( $\pm 0.17$ ) | 4.27 | 4.26 | 5.95 | 1096.07  |
| <i>compas</i>           | 67.60 | 40     | 10.95 | 0.03 ( $\pm 0.07$ )          | 0.04 ( $\pm 0.08$ ) | 0.05 ( $\pm 0.09$ ) | 5.68 | 5.83 | 6.78 | 1082.32  |
| <i>fetal health</i>     | 91.85 | 93     | 11.33 | 0.12 ( $\pm 0.06$ )          | 0.12 ( $\pm 0.06$ ) | 0.23 ( $\pm 0.11$ ) | 5.59 | 5.59 | 6.00 | 930.61   |
| <i>dorothea</i>         | 91.88 | 100000 | 12.90 | 0.25 ( $\pm 0.10$ )          | 0.25 ( $\pm 0.10$ ) | –                   | 6.70 | 6.70 | –    | –        |
| <i>bank market.</i>     | 89.49 | 882    | 13.11 | 0.29 ( $\pm 0.08$ )          | 0.29 ( $\pm 0.07$ ) | –                   | 6.99 | 6.99 | –    | –        |
| <i>mnist49</i>          | 95.99 | 784    | 15.57 | 0.37 ( $\pm 0.14$ )          | 0.37 ( $\pm 0.14$ ) | –                   | 6.97 | 6.89 | –    | –        |
| <i>spambase</i>         | 92.11 | 236    | 16.09 | 0.24 ( $\pm 0.11$ )          | 0.23 ( $\pm 0.09$ ) | –                   | 6.87 | 6.87 | –    | –        |
| <i>adult</i>            | 81.16 | 2433   | 16.43 | 0.33 ( $\pm 0.12$ )          | 0.33 ( $\pm 0.12$ ) | –                   | 6.87 | 6.87 | –    | –        |
| <i>mnist38</i>          | 96.42 | 784    | 17.89 | 0.37 ( $\pm 0.13$ )          | 0.38 ( $\pm 0.14$ ) | –                   | 6.93 | 6.93 | –    | –        |
| <i>cnae</i>             | 92.59 | 856    | 19.07 | 0.32 ( $\pm 0.25$ )          | 0.32 ( $\pm 0.25$ ) | –                   | 5.97 | 5.97 | –    | –        |
| <i>gisette</i>          | 94.10 | 5000   | 21.42 | 0.32 ( $\pm 0.11$ )          | 0.32 ( $\pm 0.11$ ) | –                   | 6.88 | 6.88 | –    | –        |
| <i>farm ads</i>         | 80.78 | 54877  | 23.15 | 0.13 ( $\pm 0.17$ )          | 0.13 ( $\pm 0.17$ ) | –                   | 6.31 | 6.31 | –    | –        |

Table 2: Experimental results on 50 benchmarks for decision tree explanations, using  $k = 7$ .

| Benchmark        |       |                 | $\epsilon_{h,x}(S)$     |                         |                         | S    |      |      | Time (s) |        |         |
|------------------|-------|-----------------|-------------------------|-------------------------|-------------------------|------|------|------|----------|--------|---------|
| name             | acc   | d               | GA                      | GD                      | SAT                     | GA   | GD   | SAT  | GA       | GD     | SAT     |
| shuttle          | 94.87 | 9               | 0.0019 ( $\pm 0.0229$ ) | 0.0017 ( $\pm 0.0203$ ) | 0.0017 ( $\pm 0.0203$ ) | 2.15 | 2.75 | 4.26 | 0.0002   | 0.0004 | 1.02    |
| tic-tac-toe      | 95.58 | 9               | 0.0008 ( $\pm 0.0102$ ) | 0.0092 ( $\pm 0.0326$ ) | 0.0008 ( $\pm 0.0101$ ) | 4.68 | 4.97 | 5.85 | 0.0006   | 0.0008 | 0.79    |
| patient treat.   | 66.77 | 10              | 0.0154 ( $\pm 0.0555$ ) | 0.0157 ( $\pm 0.0664$ ) | 0.0152 ( $\pm 0.0574$ ) | 5.67 | 6.37 | 6.52 | 0.0023   | 0.0034 | 35.30   |
| wine             | 70.0  | 11              | 0.0150 ( $\pm 0.0406$ ) | 0.0308 ( $\pm 0.0487$ ) | 0.0153 ( $\pm 0.0383$ ) | 5.98 | 6.66 | 6.90 | 0.0025   | 0.0037 | 25.83   |
| hepatitis        | 81.74 | 13              | 0.0038 ( $\pm 0.0377$ ) | 0.0087 ( $\pm 0.0318$ ) | 0.0034 ( $\pm 0.0187$ ) | 2.86 | 4.07 | 3.85 | 0.0002   | 0.0002 | 0.63    |
| hungarian        | 80.90 | 13              | 0.0075 ( $\pm 0.0503$ ) | 0.0116 ( $\pm 0.0271$ ) | 0.0075 ( $\pm 0.0442$ ) | 5.46 | 5.80 | 6.90 | 0.0009   | 0.0013 | 1.53    |
| anneal2          | 99.63 | 14              | 0.0248 ( $\pm 0.0498$ ) | 0.0332 ( $\pm 0.0450$ ) | 0.0245 ( $\pm 0.0490$ ) | 3.66 | 3.98 | 5.00 | 0.0002   | 0.0003 | 0.32    |
| biomed           | 93.65 | 15              | 0.0000 ( $\pm 0.0000$ ) | 0.0000 ( $\pm 0.0000$ ) | 0.0009 ( $\pm 0.0000$ ) | 4.52 | 4.59 | 4.52 | 0.0004   | 0.0005 | 0.47    |
| voting           | 93.89 | 16              | 0.0026 ( $\pm 0.0188$ ) | 0.0048 ( $\pm 0.0269$ ) | 0.0026 ( $\pm 0.0164$ ) | 3.01 | 3.78 | 5.02 | 0.0003   | 0.0006 | 0.54    |
| balance          | 81.38 | 17              | 0.0032 ( $\pm 0.0118$ ) | 0.0121 ( $\pm 0.0183$ ) | 0.0020 ( $\pm 0.0084$ ) | 5.45 | 5.77 | 5.85 | 0.0014   | 0.0025 | 27.22   |
| mushroom         | 100.0 | 17              | 0.0009 ( $\pm 0.0066$ ) | 0.0052 ( $\pm 0.0222$ ) | 0.0005 ( $\pm 0.0015$ ) | 4.55 | 4.87 | 5.45 | 0.0004   | 0.0007 | 2.59    |
| backache         | 85.19 | 18              | 0.0100 ( $\pm 0.0357$ ) | 0.0535 ( $\pm 0.0512$ ) | 0.0080 ( $\pm 0.0237$ ) | 3.43 | 4.43 | 4.92 | 0.0003   | 0.0006 | 1.16    |
| placement        | 92.31 | 18              | 0.0000 ( $\pm 0.0000$ ) | 0.0010 ( $\pm 0.0291$ ) | 0.0000 ( $\pm 0.0000$ ) | 3.66 | 4.15 | 5.10 | 0.0002   | 0.0002 | 0.32    |
| ionosphere       | 96.23 | 19              | 0.0121 ( $\pm 0.0490$ ) | 0.0301 ( $\pm 0.0493$ ) | 0.0075 ( $\pm 0.0355$ ) | 4.36 | 5.00 | 5.85 | 0.0005   | 0.0001 | 1.51    |
| autos            | 85.48 | 21              | 0.0499 ( $\pm 0.0741$ ) | 0.0838 ( $\pm 0.0650$ ) | 0.0045 ( $\pm 0.0219$ ) | 4.48 | 4.90 | 6.12 | 0.0005   | 0.0009 | 5.71    |
| cars             | 91.80 | 21              | 0.0329 ( $\pm 0.0864$ ) | 0.0701 ( $\pm 0.1120$ ) | 0.0020 ( $\pm 0.0550$ ) | 3.47 | 3.71 | 5.05 | 0.0006   | 0.0013 | 4.70    |
| primary tumour   | 81.37 | 23              | 0.0206 ( $\pm 0.0493$ ) | 0.0464 ( $\pm 0.0459$ ) | 0.0074 ( $\pm 0.0221$ ) | 5.37 | 5.74 | 6.08 | 0.0013   | 0.0030 | 47.23   |
| vehicle          | 96.06 | 23              | 0.0304 ( $\pm 0.0458$ ) | 0.0619 ( $\pm 0.0608$ ) | 0.0143 ( $\pm 0.0344$ ) | 4.49 | 4.77 | 4.90 | 0.0008   | 0.0014 | 14.31   |
| breast cancer    | 92.98 | 30              | 0.0091 ( $\pm 0.0293$ ) | 0.0244 ( $\pm 0.0439$ ) | 0.0066 ( $\pm 0.0237$ ) | 4.43 | 4.94 | 5.52 | 0.0005   | 0.0009 | 4.84    |
| student perf     | 90.77 | 30              | 0.0077 ( $\pm 0.0316$ ) | 0.0219 ( $\pm 0.0394$ ) | 0.0005 ( $\pm 0.0010$ ) | 4.23 | 5.00 | 5.75 | 0.0007   | 0.0016 | 10.50   |
| glass            | 87.69 | 31              | 0.1168 ( $\pm 0.0791$ ) | 0.1410 ( $\pm 0.0906$ ) | 0.0772 ( $\pm 0.0758$ ) | 4.75 | 4.85 | 5.50 | 0.0010   | 0.0019 | 56.90   |
| kr-vs-kp         | 99.79 | 32              | 0.0096 ( $\pm 0.0299$ ) | 0.0300 ( $\pm 0.0573$ ) | 0.0095 ( $\pm 0.0285$ ) | 3.07 | 3.52 | 4.40 | 0.0015   | 0.0047 | 34.30   |
| tae              | 69.57 | 32              | 0.0339 ( $\pm 0.0634$ ) | 0.0385 ( $\pm 0.0950$ ) | 0.0236 ( $\pm 0.0492$ ) | 5.20 | 5.37 | 5.82 | 0.0011   | 0.0022 | 72.75   |
| schizophrenia    | 90.20 | 33              | 0.0022 ( $\pm 0.0142$ ) | 0.0024 ( $\pm 0.0089$ ) | 0.0019 ( $\pm 0.0070$ ) | 4.29 | 4.48 | 6.80 | 0.0014   | 0.0037 | 46.06   |
| cleveland2       | 65.93 | 35              | 0.1217 ( $\pm 0.0797$ ) | 0.1594 ( $\pm 0.0923$ ) | 0.0626 ( $\pm 0.0750$ ) | 4.87 | 4.93 | 5.04 | 0.0017   | 0.0048 | 301.59  |
| haberman         | 67.39 | 53              | 0.7467 ( $\pm 0.1123$ ) | 0.7941 ( $\pm 0.1074$ ) | 0.7430 ( $\pm 0.1252$ ) | 2.96 | 3.02 | 3.08 | 0.0034   | 0.0041 | 31.50   |
| compas           | 66.41 | 40              | 0.0569 ( $\pm 0.0697$ ) | 0.0694 ( $\pm 0.0783$ ) | 0.1586 ( $\pm 0.0879$ ) | 5.65 | 6.55 | 7.00 | 0.0298   | 0.0931 | 1486.50 |
| horse colic      | 79.28 | 40              | 0.0503 ( $\pm 0.0699$ ) | 0.0342 ( $\pm 0.0543$ ) | 0.0133 ( $\pm 0.0176$ ) | 6.43 | 6.70 | 7.00 | 0.0028   | 0.0059 | 671.60  |
| meta-data        | 88.68 | 44              | 0.0223 ( $\pm 0.0821$ ) | 0.0290 ( $\pm 0.0572$ ) | 0.0199 ( $\pm 0.0771$ ) | 3.62 | 5.54 | 5.96 | 0.0017   | 0.0089 | 171.91  |
| employee attr.   | 81.88 | 63              | 0.0708 ( $\pm 0.0610$ ) | 0.0960 ( $\pm 0.0723$ ) | 0.2212 ( $\pm 0.1525$ ) | 6.25 | 6.45 | 7.00 | 0.0958   | 0.1032 | 1340.60 |
| loan eligibility | 70.14 | 68              | 0.0629 ( $\pm 0.0616$ ) | 0.0870 ( $\pm 0.0668$ ) | 0.0956 ( $\pm 0.0500$ ) | 6.10 | 6.00 | 6.50 | 0.0090   | 0.0378 | 856.10  |
| australian       | 79.23 | 70              | 0.0000 ( $\pm 0.0000$ ) | 0.0311 ( $\pm 0.0592$ ) | 0.0137 ( $\pm 0.0286$ ) | 4.70 | 6.40 | 6.10 | 0.0041   | 0.0308 | 573.94  |
| liver disorders  | 71.43 | 84              | 0.0939 ( $\pm 0.1087$ ) | 0.1101 ( $\pm 0.0891$ ) | 0.1278 ( $\pm 0.0878$ ) | 6.03 | 6.90 | 7.00 | 0.0150   | 0.0744 | 897.81  |
| contraceptive    | 51.36 | 90              | 0.0600 ( $\pm 0.0800$ ) | 0.0600 ( $\pm 0.0800$ ) | 0.3910 ( $\pm 0.1700$ ) | 4.27 | 4.26 | 5.95 | 0.0452   | 0.0892 | 1096.07 |
| fetal health     | 91.85 | 93              | 0.1200 ( $\pm 0.0600$ ) | 0.1200 ( $\pm 0.0600$ ) | 0.2310 ( $\pm 0.1100$ ) | 5.59 | 5.59 | 6.25 | 0.0568   | 0.0723 | 930.61  |
| pimas indians    | 72.56 | 97              | 0.1181 ( $\pm 0.0834$ ) | 0.1897 ( $\pm 0.1072$ ) | 0.1812 ( $\pm 0.0622$ ) | 6.75 | 7.00 | 6.95 | 0.0183   | 0.1675 | 709.57  |
| spambase         | 92.03 | 236             | 0.1268 ( $\pm 0.0645$ ) | 0.1845 ( $\pm 0.0813$ ) | —                       | 6.89 | 6.99 | —    | 0.0974   | 0.1828 | —       |
| madelon          | 71.03 | 500             | 0.1257 ( $\pm 0.1198$ ) | 0.1971 ( $\pm 0.0930$ ) | —                       | 6.85 | 6.98 | —    | 0.0709   | 0.2611 | —       |
| gina-prior       | 87.13 | 784             | 0.2073 ( $\pm 0.0837$ ) | 0.2496 ( $\pm 0.0874$ ) | —                       | 6.97 | 6.99 | —    | 0.1087   | 1.3443 | —       |
| mnist38          | 95.82 | 784             | 0.1561 ( $\pm 0.0743$ ) | 0.2675 ( $\pm 0.0698$ ) | —                       | 6.95 | 7.00 | —    | 0.1082   | 1.4738 | —       |
| mnist49          | 95.02 | 784             | 0.1857 ( $\pm 0.0731$ ) | 0.2867 ( $\pm 0.0970$ ) | —                       | 6.97 | 6.98 | —    | 0.2019   | 1.3611 | —       |
| bank market.     | 89.49 | 882             | 0.3245 ( $\pm 0.1201$ ) | 0.3890 ( $\pm 0.1267$ ) | —                       | 6.99 | 6.99 | —    | 0.2631   | 1.4288 | —       |
| gina-agnostic    | 83.86 | 970             | 0.1593 ( $\pm 0.0792$ ) | 0.2102 ( $\pm 0.1084$ ) | —                       | 6.96 | 7.00 | —    | 0.1306   | 1.7953 | —       |
| christine        | 50.37 | 1023            | 0.2710 ( $\pm 0.0678$ ) | 0.3207 ( $\pm 0.0816$ ) | —                       | 7.00 | 7.00 | —    | 0.6179   | 1.9402 | —       |
| adult            | 81.16 | 2433            | 0.3882 ( $\pm 0.1521$ ) | 0.3925 ( $\pm 0.1877$ ) | —                       | 6.87 | 6.87 | —    | 0.1461   | 0.9339 | —       |
| email spam       | 94.07 | 3000            | 0.1090 ( $\pm 0.1494$ ) | 0.1761 ( $\pm 0.2169$ ) | —                       | 4.90 | 6.78 | —    | 0.0704   | 1.0079 | —       |
| gisette          | 93.81 | 5000            | 0.1309 ( $\pm 0.0706$ ) | 0.2006 ( $\pm 0.1056$ ) | —                       | 6.87 | 6.94 | —    | 0.0746   | 2.8047 | —       |
| dexter           | 83.89 | 20000           | 0.0321 ( $\pm 0.0532$ ) | 0.0614 ( $\pm 0.0525$ ) | —                       | 5.74 | 6.63 | —    | 0.1250   | 0.2330 | —       |
| farm ads         | 80.78 | 54877           | 0.1300 ( $\pm 0.1700$ ) | 0.1300 ( $\pm 0.1700$ ) | —                       | 6.31 | 6.31 | —    | 0.2710   | 0.9892 | —       |
| dorothea         | 93.04 | 10 <sup>5</sup> | 0.2383 ( $\pm 0.0743$ ) | 0.2514 ( $\pm 0.0758$ ) | —                       | 6.87 | 6.97 | —    | 0.2027   | 1.2040 | —       |

Table 3: Experimental results on 50 benchmarks, using  $I = [d]$  and  $k = 7$ .

| Benchmark               | Source | Link                                                                                                                                                                           |
|-------------------------|--------|--------------------------------------------------------------------------------------------------------------------------------------------------------------------------------|
| <i>adult</i>            | UCI    | <a href="https://archive.ics.uci.edu/ml/datasets/adult">https://archive.ics.uci.edu/ml/datasets/adult</a>                                                                      |
| <i>anneal2</i>          | UCI    | <a href="https://archive.ics.uci.edu/ml/datasets/Annealing">https://archive.ics.uci.edu/ml/datasets/Annealing</a>                                                              |
| <i>australian</i>       | OpenML | <a href="https://www.openml.org/search?type=data&amp;status=active&amp;id=40981">https://www.openml.org/search?type=data&amp;status=active&amp;id=40981</a>                    |
| <i>autos</i>            | UCI    | <a href="https://archive.ics.uci.edu/ml/machine-learning-databases/autos/">https://archive.ics.uci.edu/ml/machine-learning-databases/autos/</a>                                |
| <i>backache</i>         | Kaggle | <a href="http://www.kaggle.com/datasets/sammy123/lower-back-pain-symptoms-dataset">www.kaggle.com/datasets/sammy123/lower-back-pain-symptoms-dataset</a>                       |
| <i>balance</i>          | UCI    | <a href="https://archive.ics.uci.edu/ml/datasets/balance+scale">https://archive.ics.uci.edu/ml/datasets/balance+scale</a>                                                      |
| <i>bank market.</i>     | UCI    | <a href="https://archive.ics.uci.edu/ml/datasets/bank+marketing">https://archive.ics.uci.edu/ml/datasets/bank+marketing</a>                                                    |
| <i>biomed</i>           | OpenML | <a href="https://www.openml.org/search?type=data&amp;status=active&amp;id=481">https://www.openml.org/search?type=data&amp;status=active&amp;id=481</a>                        |
| <i>cars</i>             | OpenML | <a href="http://www.openml.org/search?type=data&amp;status=active&amp;id=967">www.openml.org/search?type=data&amp;status=active&amp;id=967</a>                                 |
| <i>christine</i>        | OpenML | <a href="https://www.openml.org/search?type=data&amp;status=active&amp;id=41142">https://www.openml.org/search?type=data&amp;status=active&amp;id=41142</a>                    |
| <i>cleveland2</i>       | Kaggle | <a href="https://www.kaggle.com/datasets/cherngs/heart-disease-cleveland-uci">https://www.kaggle.com/datasets/cherngs/heart-disease-cleveland-uci</a>                          |
| <i>cnae</i>             | UCI    | <a href="https://archive.ics.uci.edu/ml/datasets/cnae-9">https://archive.ics.uci.edu/ml/datasets/cnae-9</a>                                                                    |
| <i>compas</i>           | OpenML | <a href="http://www.openml.org/search?type=data&amp;sort=runs&amp;id=42193&amp;status=active">www.openml.org/search?type=data&amp;sort=runs&amp;id=42193&amp;status=active</a> |
| <i>contraceptive</i>    | UCI    | <a href="https://archive.ics.uci.edu/ml/datasets/Contraceptive+Method+Choice">https://archive.ics.uci.edu/ml/datasets/Contraceptive+Method+Choice</a>                          |
| <i>dexter</i>           | UCI    | <a href="https://archive.ics.uci.edu/ml/datasets/dexter">https://archive.ics.uci.edu/ml/datasets/dexter</a>                                                                    |
| <i>dorothea</i>         | OpenML | <a href="http://www.openml.org/search?type=data&amp;status=active&amp;id=4137">www.openml.org/search?type=data&amp;status=active&amp;id=4137</a>                               |
| <i>email spam</i>       | Kaggle | <a href="http://www.kaggle.com/datasets/veleon/ham-and-spam-dataset">www.kaggle.com/datasets/veleon/ham-and-spam-dataset</a>                                                   |
| <i>employee attr.</i>   | Kaggle | <a href="https://www.kaggle.com/datasets/HRAnalyticRepository/employee-attrition-data">https://www.kaggle.com/datasets/HRAnalyticRepository/employee-attrition-data</a>        |
| <i>farm-ads</i>         | UCI    | <a href="https://archive.ics.uci.edu/ml/datasets/Farm+Ads">https://archive.ics.uci.edu/ml/datasets/Farm+Ads</a>                                                                |
| <i>fetal health</i>     | Kaggle | <a href="http://www.kaggle.com/datasets/andrewmvd/fetal-health-classification">www.kaggle.com/datasets/andrewmvd/fetal-health-classification</a>                               |
| <i>gina agnostic</i>    | OpenML | <a href="http://www.openml.org/search?type=data&amp;sort=runs&amp;id=1038&amp;status=active">www.openml.org/search?type=data&amp;sort=runs&amp;id=1038&amp;status=active</a>   |
| <i>gina prior</i>       | OpenML | <a href="https://www.openml.org/search?type=data&amp;status=active&amp;id=1042">https://www.openml.org/search?type=data&amp;status=active&amp;id=1042</a>                      |
| <i>gisette</i>          | UCI    | <a href="https://archive.ics.uci.edu/ml/datasets/Gisette">https://archive.ics.uci.edu/ml/datasets/Gisette</a>                                                                  |
| <i>glass</i>            | UCI    | <a href="https://archive.ics.uci.edu/ml/datasets/glass+identification">https://archive.ics.uci.edu/ml/datasets/glass+identification</a>                                        |
| <i>haberman</i>         | UCI    | <a href="https://archive.ics.uci.edu/ml/datasets/haberman'+s+survival">https://archive.ics.uci.edu/ml/datasets/haberman'+s+survival</a>                                        |
| <i>hepatitis</i>        | UCI    | <a href="https://archive.ics.uci.edu/ml/datasets/hepatitis">https://archive.ics.uci.edu/ml/datasets/hepatitis</a>                                                              |
| <i>horse colic</i>      | Kaggle | <a href="http://www.kaggle.com/datasets/uciml/horse-colic?select=horse.csv">www.kaggle.com/datasets/uciml/horse-colic?select=horse.csv</a>                                     |
| <i>hungarian</i>        | OpenML | <a href="http://www.openml.org/search?type=data&amp;status=active&amp;id=858">www.openml.org/search?type=data&amp;status=active&amp;id=858</a>                                 |
| <i>indian liver</i>     | Kaggle | <a href="http://www.kaggle.com/datasets/uciml/indian-liver-patient-records">www.kaggle.com/datasets/uciml/indian-liver-patient-records</a>                                     |
| <i>ionosphere</i>       | UCI    | <a href="https://archive.ics.uci.edu/ml/datasets/ionosphere">https://archive.ics.uci.edu/ml/datasets/ionosphere</a>                                                            |
| <i>kr-vs-kp</i>         | UCI    | <a href="https://archive.ics.uci.edu/ml/datasets/Chess+(King-Rook+vs.+King-Pawn)">https://archive.ics.uci.edu/ml/datasets/Chess+(King-Rook+vs.+King-Pawn)</a>                  |
| <i>liver disorders</i>  | UCI    | <a href="https://archive.ics.uci.edu/ml/datasets/Liver+Disorders">https://archive.ics.uci.edu/ml/datasets/Liver+Disorders</a>                                                  |
| <i>loan eligibility</i> | Kaggle | <a href="http://www.kaggle.com/datasets/devzohaib/eligibility-prediction-for-loan">www.kaggle.com/datasets/devzohaib/eligibility-prediction-for-loan</a>                       |
| <i>madelon</i>          | UCI    | <a href="https://archive.ics.uci.edu/ml/datasets/madelon">https://archive.ics.uci.edu/ml/datasets/madelon</a>                                                                  |
| <i>meta-data</i>        | UCI    | <a href="https://archive.ics.uci.edu/ml/datasets/Meta-data">https://archive.ics.uci.edu/ml/datasets/Meta-data</a>                                                              |
| <i>mnist38</i>          | Kaggle | <a href="https://www.kaggle.com/datasets/oddrationale/mnist-in-csv">https://www.kaggle.com/datasets/oddrationale/mnist-in-csv</a>                                              |
| <i>mnist49</i>          | Kaggle | <a href="https://www.kaggle.com/datasets/oddrationale/mnist-in-csv">https://www.kaggle.com/datasets/oddrationale/mnist-in-csv</a>                                              |
| <i>mushroom</i>         | UCI    | <a href="https://archive.ics.uci.edu/ml/datasets/mushroom">https://archive.ics.uci.edu/ml/datasets/mushroom</a>                                                                |
| <i>patient treat.</i>   | Kaggle | <a href="http://www.kaggle.com/datasets/manishkc06/patient-treatment-classification">www.kaggle.com/datasets/manishkc06/patient-treatment-classification</a>                   |
| <i>pima indians</i>     | Kaggle | <a href="http://www.kaggle.com/datasets/uciml/pima-indians-diabetes-database">www.kaggle.com/datasets/uciml/pima-indians-diabetes-database</a>                                 |
| <i>placement</i>        | Kaggle | <a href="https://www.kaggle.com/datasets/ahsan81/job-placement-dataset">https://www.kaggle.com/datasets/ahsan81/job-placement-dataset</a>                                      |
| <i>primary tumor</i>    | UCI    | <a href="https://archive.ics.uci.edu/ml/datasets/primary+tumor">https://archive.ics.uci.edu/ml/datasets/primary+tumor</a>                                                      |
| <i>schizophrenia</i>    | UCI    | <a href="http://archive.ics.uci.edu/ml/datasets/mhealth+dataset">http://archive.ics.uci.edu/ml/datasets/mhealth+dataset</a>                                                    |
| <i>shuttle</i>          | UCI    | <a href="https://archive.ics.uci.edu/ml/datasets/Shuttle+Landing+Control">https://archive.ics.uci.edu/ml/datasets/Shuttle+Landing+Control</a>                                  |
| <i>spambase</i>         | UCI    | <a href="https://archive.ics.uci.edu/ml/datasets/spambase">https://archive.ics.uci.edu/ml/datasets/spambase</a>                                                                |
| <i>student perf.</i>    | OpenML | <a href="http://www.openml.org/search?type=data&amp;sort=runs&amp;id=42351&amp;status=active">www.openml.org/search?type=data&amp;sort=runs&amp;id=42351&amp;status=active</a> |
| <i>tae</i>              | UCI    | <a href="https://archive.ics.uci.edu/ml/datasets/teaching+assistant+evaluation">archive.ics.uci.edu/ml/datasets/teaching+assistant+evaluation</a>                              |
| <i>tic-tac-toe</i>      | UCI    | <a href="https://archive.ics.uci.edu/ml/datasets/Tic-Tac-Toe+Endgame">https://archive.ics.uci.edu/ml/datasets/Tic-Tac-Toe+Endgame</a>                                          |
| <i>vehicle</i>          | Kaggle | <a href="http://www.kaggle.com/datasets/nehalbirla/vehicle-dataset-from-cardexho">www.kaggle.com/datasets/nehalbirla/vehicle-dataset-from-cardexho</a>                         |
| <i>voting</i>           | Kaggle | <a href="http://www.kaggle.com/datasets/devvret/congressional-voting-records">www.kaggle.com/datasets/devvret/congressional-voting-records</a>                                 |
| <i>wine</i>             | Kaggle | <a href="http://www.kaggle.com/datasets/uciml/red-wine-quality-cortez-et-al-2009">www.kaggle.com/datasets/uciml/red-wine-quality-cortez-et-al-2009</a>                         |

Table 4: List of benchmarks used in the experiments. Notably, *anneal2* is a binarized version of *annealing*, where the goal is to separate the label 2 from all other labels; *mnist49* (resp. *mnist38*) is a subset of *mnist* restricted to the instances labeled as 4 and 9 (resp. 3 and 8).
